# Supplementary material for: Going beyond Mindfulness: How Concentration and Tranquility Commonly Co-Arising with Mindfulness Account for Mental Health
Source: MDPI journal article supplement (doi:10.3390/ijerph20085470), 2023-04-11
Supplement: s1 [file s1]

**Table S1.** Questionnaire to be Used for the Concentration Scale and Tranquility Scale.

| <b>Concentration Scale</b>                                                                              |                             |                        |                                    |                               |                   |                           |
|---------------------------------------------------------------------------------------------------------|-----------------------------|------------------------|------------------------------------|-------------------------------|-------------------|---------------------------|
| How often were you in the following mental state (if the following situation happened)?                 | 1 =<br>never                | 2 =<br>seldom          | 3 =<br>occasionally                | 4 =<br>sometimes              | 5 =<br>often      | 6 =<br>always             |
| 1. When listening to a person speaking, I am not distracted by things going on around me (e.g., noise). |                             |                        |                                    |                               |                   |                           |
| 2. When doing a task, I stay focused on what I am doing.                                                |                             |                        |                                    |                               |                   |                           |
| 3. When doing a task, I am not distracted by things going on around me (e.g., noise).                   |                             |                        |                                    |                               |                   |                           |
| 4. When listening to a person speaking, I stay focused on listening.                                    |                             |                        |                                    |                               |                   |                           |
| <b>Tranquility Scale</b>                                                                                |                             |                        |                                    |                               |                   |                           |
| To what extent do you agree with the following description about yourself?                              | 1 =<br>very untrue<br>of me | 2 =<br>untrue of<br>me | 3 =<br>somewhat<br>untrue of<br>me | 4 =<br>somewhat<br>true of me | 5 =<br>true of me | 6 =<br>very true of<br>me |
| 1. When I face unpleasant encounter, I cannot calm myself down. *                                       |                             |                        |                                    |                               |                   |                           |
| 2. I can stabilize my emotion to create a feeling of calmness.                                          |                             |                        |                                    |                               |                   |                           |
| 3. When I face unpredictable future outcomes, I can calm myself down.                                   |                             |                        |                                    |                               |                   |                           |
| How often were you in the following mental state?                                                       | 1 =<br>never                | 2 =<br>seldom          | 3 =<br>occasionally                | 4 =<br>sometimes              | 5 =<br>often      | 6 =<br>always             |
| 4. I feel calm and at ease.                                                                             |                             |                        |                                    |                               |                   |                           |

\* Reversed question.
